# Supplementary material for: A metabolomic study of adipose tissue in mice with a disruption of the circadian system
Source: Royal Society of Chemistry journal article supplement (doi:10.1039/c5mb00032g), 2015-03-23
Supplement: c5mb00032g1.pdf [file c5mb00032g1.pdf]

**A metabolomic study of adipose tissue in mice with a disruption of the circadian system.**

**Supplementary Data**

Cecilia Castro<sup>1\*</sup>, William Briggs<sup>1\*</sup>, Georgios K. Paschos<sup>2</sup>, Garret A. FitzGerald<sup>2</sup>, & Julian L. Griffin<sup>1,3</sup>.

<sup>1</sup>Department of Biochemistry and Cambridge Systems Biology Centre, University of Cambridge, 80 Tennis Court Road, Cambridge, CB2 1GA, UK.

<sup>2</sup>Perelman School of Medicine, Institute for Translational Medicine and Therapeutics, University of Pennsylvania, 3400 Civic Center Boulevard, Philadelphia, PA 19104-5158, Pennsylvania, USA.

<sup>3</sup>Human Nutrition Research, Medical Research Council, Elsie Widdowson Laboratory, 120 Fulbourn Road, Cambridge, CB1 9NL, UK.

\*These authors equally contributed to the paper.

**Table S1.** Parameters for validated models built considering LC-MS data for ASWAT. In the first part of the table, the ones obtained comparing control and *Ad-Arntl<sup>-/-</sup>* mice are presented; in the second part all the validated models comparing the same genotype at different time points are shown.

| Model | Description                                                                             | Type   | R <sup>2</sup> X | R <sup>2</sup> Y | Q <sup>2</sup> |
|-------|-----------------------------------------------------------------------------------------|--------|------------------|------------------|----------------|
| M1    | Both genotypes at all time points                                                       | PCA    | 42.6%            |                  | 23.3%          |
| M2    | Both genotypes and all time points                                                      | PLS-DA | 42.5%            | 73.8%            | 56.6%          |
| M4    | Both genotypes at time T=0, classes assigned by genotype.                               | PLS-DA | 58.2%            | 92.0%            | 71.5%          |
| M5    | Both genotypes at time T=6, classes assigned by genotype.                               | PLS-DA | 20.3%            | 83.0%            | 46.8%          |
| M6    | Both genotypes at time T=12, classes assigned by genotype.                              | PLS-DA | 29.9%            | 75.7%            | 62.2%          |
| M7    | Both genotypes at time T=18, classes assigned by genotype.                              | PLS-DA | 23.7%            | 79.1%            | 51.0%          |
| M11   | Only <i>Ad-Arntl<sup>-/-</sup></i> mice at time T=0 and T=12, classes assigned by time. | PLS-DA | 16.1%            | 81.0%            | 34.2%          |
| M12   | Only <i>Ad-Arntl<sup>-/-</sup></i> mice at time T=0 and T=18, classes assigned by time. | PLS-DA | 16.4%            | 83.5%            | 50.0%          |

**Table S2.** Parameters for validated models built considering GC-FID data for ASWAT.

| Model | Description                                                                               | Type   | R <sup>2</sup> X | R <sup>2</sup> Y | Q <sup>2</sup> |
|-------|-------------------------------------------------------------------------------------------|--------|------------------|------------------|----------------|
| M1    | Both genotypes at all time points                                                         | PCA    | 46.2%            |                  | 24.3%          |
| M2    | Both genotypes and all time points                                                        | PLS-DA | 37.4%            | 90.4%            | 85.6%          |
| M4    | Both genotypes at time T=0, classes assigned by genotype.                                 | PLS-DA | 19.2%            | 90.9%            | 56.3%          |
| M5    | Both genotypes at time T=6, classes assigned by genotype.                                 | PLS-DA | 28.2%            | 82.3%            | 67.7%          |
| M6    | Both genotypes at time T=12, classes assigned by genotype.                                | PLS-DA | 24.9%            | 91.1%            | 68.7%          |
| M7    | Both genotypes at time T=18, classes assigned by genotype.                                | PLS-DA | 70.4%            | 98.6%            | 88.1%          |
| M8    | Only Ad- <i>Arntl</i> <sup>-/-</sup> mice at time T=0 and T=12, classes assigned by time. | PLS-DA | 45.5%            | 77.2%            | 10.3%          |

**Table S3.** Parameters for validated models built considering LC-MS data for BAT.

| <b>Model</b> | <b>Description</b>                                                                   | <b>Type</b> | <b>R<sup>2</sup>X (%)</b> | <b>R<sup>2</sup>Y (%)</b> | <b>Q<sup>2</sup> (%)</b> |
|--------------|--------------------------------------------------------------------------------------|-------------|---------------------------|---------------------------|--------------------------|
| <b>M1</b>    | Both genotypes and all time points.                                                  | PCA-X       | 38.4                      | -                         | <b>23.1</b>              |
| <b>M2</b>    | Both genotypes and all time points, classes assigned by genotype.                    | PLS-DA      | 35.7                      | 74.1                      | <b>45.5</b>              |
| <b>M4</b>    | Both genotypes, only at T=0, classes assigned by genotype.                           | PLS-DA      | 52.7                      | 99.0                      | <b>84.2</b>              |
| <b>M5</b>    | Both genotypes, only at T=6, classes assigned by genotype.                           | PLS-DA      | 36.2                      | 67.2                      | <b>43.7</b>              |
| <b>M6</b>    | Both genotypes, only at T=12, classes assigned by genotype.                          | PLS-DA      | 53.2                      | 99.2                      | <b>72.0</b>              |
| <b>M7</b>    | Both genotypes, only at T=18, classes assigned by genotype.                          | PLS-DA      | 26.4                      | 76.9                      | <b>49.1</b>              |
| <b>M8</b>    | Both genotypes and all time points, classes assigned by time.                        | PLS-DA      | 27.1                      | 9.35                      | <b>3.29</b>              |
| <b>M11</b>   | Both genotypes, at T=0 and T=6, classes assigned by time.                            | PLS-DA      | 48.2                      | 90.0                      | <b>52.4</b>              |
| <b>M12</b>   | Only control mice, at T=0 and T=6, classes assigned by time.                         | PLS-DA      | 65.5                      | 99.2                      | <b>33.0</b>              |
| <b>M13</b>   | Only Ad- <i>Arntl</i> <sup>-/-</sup> mice, at T=0 and T=6, classes assigned by time. | PLS-DA      | 47.4                      | 98.7                      | <b>63.3</b>              |
| <b>M20</b>   | Both genotypes, at T=6 and T=12, classes assigned by time.                           | PLS-DA      | 37.7                      | 72.8                      | <b>37.4</b>              |
| <b>M21</b>   | Only control mice, at T=6 and T=12, classes assigned by time.                        | PLS-DA      | 32.5                      | 51.1                      | <b>12.6</b>              |
| <b>M24</b>   | Only control mice, at T=6 and T=18, classes assigned by time.                        | PLS-DA      | 29.2                      | 55.0                      | <b>17.9</b>              |

**Table S4.** Parameters for validated models built considering GC-FID data for BAT.

| <b>Model</b> | <b>Description</b>                                                                    | <b>Type</b> | <b>R<sup>2</sup>X (%)</b> | <b>R<sup>2</sup>Y (%)</b> | <b>Q<sup>2</sup> (%)</b> |
|--------------|---------------------------------------------------------------------------------------|-------------|---------------------------|---------------------------|--------------------------|
| <b>M1</b>    | Both genotypes and all time points.                                                   | PCA-X       | 76.5                      | -                         | <b>47.2</b>              |
| <b>M2</b>    | Both genotypes and all time points, classes assigned by genotype.                     | PLS-DA      | 52.0                      | 87.0                      | <b>75.4</b>              |
| <b>M3</b>    | Both genotypes, only at T=0, classes assigned by genotype.                            | PLS-DA      | 28.5                      | 76.3                      | <b>32.5</b>              |
| <b>M4</b>    | Both genotypes, only at T=6, classes assigned by genotype.                            | PLS-DA      | 43.8                      | 94.9                      | <b>63.7</b>              |
| <b>M5</b>    | Both genotypes, only at T=12, classes assigned by genotype.                           | PLS-DA      | 75.6                      | 90.7                      | <b>78.4</b>              |
| <b>M6</b>    | Both genotypes, only at T=18, classes assigned by genotype.                           | PLS-DA      | 56.2                      | 92.2                      | <b>73.0</b>              |
| <b>M10</b>   | Both genotypes, at T=0 and T=6, classes assigned by time.                             | PLS-DA      | 41.1                      | 48.0                      | <b>40.3</b>              |
| <b>M11</b>   | Only Ad- <i>Arntl</i> <sup>-/-</sup> mice, at T=0 and T=6, classes assigned by time.  | PLS-DA      | 39.2                      | 78.0                      | <b>62.1</b>              |
| <b>M12</b>   | Only control mice, at T=0 and T=6, classes assigned by time.                          | PLS-DA      | 53.3                      | 35.2                      | <b>19.7</b>              |
| <b>M14</b>   | Only Ad- <i>Arntl</i> <sup>-/-</sup> mice, at T=0 and T=12, classes assigned by time. | PLS-DA      | 26.5                      | 59.5                      | <b>6.39</b>              |
| <b>M16</b>   | Both genotypes, at T=0 and T=18, classes assigned by time.                            | PLS-DA      | 48.8                      | 69.0                      | <b>26.3</b>              |
| <b>M17</b>   | Only Ad- <i>Arntl</i> <sup>-/-</sup> mice, at T=0 and T=18, classes assigned by time. | PLS-DA      | 29.9                      | 50.3                      | <b>21.2</b>              |
| <b>M18</b>   | Only control mice, at T=0 and T=18, classes assigned by time.                         | PLS-DA      | 53.4                      | 30.5                      | <b>6.03</b>              |

|            |                                                                                        |        |      |      |             |
|------------|----------------------------------------------------------------------------------------|--------|------|------|-------------|
| <b>M19</b> | Both genotypes, at T=6 and T=12, classes assigned by time.                             | PLS-DA | 50.6 | 28.4 | <b>15.8</b> |
| <b>M20</b> | Only Ad- <i>Arntl</i> <sup>-/-</sup> mice, at T=6 and T=12, classes assigned by time.  | PLS-DA | 57.2 | 49.0 | <b>36.5</b> |
| <b>M22</b> | Both genotypes, at T=6 and T=18, classes assigned by time.                             | PLS-DA | 45.8 | 68.0 | <b>50.7</b> |
| <b>M23</b> | Only Ad- <i>Arntl</i> <sup>-/-</sup> mice, at T=6 and T=18, classes assigned by time.  | PLS-DA | 37.2 | 54.6 | <b>33.8</b> |
| <b>M24</b> | Only control mice, at T=6 and T=18, classes assigned by time.                          | PLS-DA | 54.2 | 79.4 | <b>31.1</b> |
| <b>M26</b> | Only Ad- <i>Arntl</i> <sup>-/-</sup> mice, at T=12 and T=18, classes assigned by time. | PLS-DA | 72.1 | 70.5 | <b>21.7</b> |

**Table S5.** Parameters for validated models built considering NMR spectroscopy data for BAT.

| <b>Model</b> | <b>Description</b>                                                                      | <b>Type</b> | <b>R<sup>2</sup>X (%)</b> | <b>R<sup>2</sup>Y (%)</b> | <b>Q<sup>2</sup> (%)</b> |
|--------------|-----------------------------------------------------------------------------------------|-------------|---------------------------|---------------------------|--------------------------|
| <b>M1</b>    | Both genotypes and all time points.                                                     | PCA-X       | 86.2                      | -                         | <b>57.0</b>              |
| <b>M4</b>    | Both genotypes and all time points, classes assigned by genotype.                       | PLS-DA      | 42.9                      | 87.9                      | <b>61.8</b>              |
| <b>M6</b>    | Both genotypes, only at T=0, classes assigned by genotype.                              | PLS-DA      | 48.0                      | 87.2                      | <b>27.2</b>              |
| <b>M7</b>    | Both genotypes, only at T=6, classes assigned by genotype.                              | PLS-DA      | 75.1                      | 98.3                      | <b>80.4</b>              |
| <b>M8</b>    | Both genotypes, only at T=12, classes assigned by genotype.                             | PLS-DA      | 21.8                      | 86.7                      | <b>53.9</b>              |
| <b>M9</b>    | Both genotypes, only at T=18, classes assigned by genotype.                             | PLS-DA      | 19.5                      | 76.8                      | <b>26.0</b>              |
| <b>M10</b>   | Both genotypes and all time points, classes assigned by time.                           | PLS-DA      | 51.3                      | 40.9                      | <b>20.4</b>              |
| <b>M11</b>   | Only Ad- <i>Arntl</i> <sup>-/-</sup> mice at all time points, classes assigned by time. | PLS-DA      | 30.3                      | 17.8                      | <b>7.43</b>              |
| <b>M12</b>   | Only control mice at all time points, classes assigned by time.                         | PLS-DA      | 53.1                      | 32.4                      | <b>11.8</b>              |
| <b>M16</b>   | Both genotypes, at T=0 and T=12, classes assigned by time.                              | PLS-DA      | 45.9                      | 78.5                      | <b>54.6</b>              |
| <b>M17</b>   | Only Ad- <i>Arntl</i> <sup>-/-</sup> mice at T=0 and T=12, classes assigned by time.    | PLS-DA      | 24.6                      | 82.5                      | <b>57.8</b>              |
| <b>M18</b>   | Only control mice at T=0 and T=12, classes assigned by time.                            | PLS-DA      | 38.5                      | 54.0                      | <b>31.4</b>              |
| <b>M19</b>   | Both genotypes, at T=0 and T=18, classes assigned by time.                              | PLS-DA      | 42.0                      | 81.0                      | <b>40.0</b>              |

|            |                                                                                       |        |      |      |             |
|------------|---------------------------------------------------------------------------------------|--------|------|------|-------------|
| <b>M20</b> | Only Ad- <i>Arntl</i> <sup>-/-</sup> mice at T=0 and T=18, classes assigned by time.  | PLS-DA | 78.8 | 99.8 | <b>86.4</b> |
| <b>M21</b> | Only control mice at T=0 and T=18, classes assigned by time.                          | PLS-DA | 42.0 | 43.9 | <b>20.5</b> |
| <b>M22</b> | Both genotypes, at T=6 and T=12, classes assigned by time.                            | PLS-DA | 39.0 | 86.7 | <b>48.7</b> |
| <b>M23</b> | Only Ad- <i>Arntl</i> <sup>-/-</sup> mice at T=6 and T=12, classes assigned by time.  | PLS-DA | 53.9 | 90.7 | <b>63.2</b> |
| <b>M24</b> | Only control mice at T=6 and T=12, classes assigned by time.                          | PLS-DA | 26.2 | 73.5 | <b>41.0</b> |
| <b>M25</b> | Both genotypes at T=6 and T=18, classes assigned by time.                             | PLS-DA | 30.5 | 66.0 | <b>60.3</b> |
| <b>M26</b> | Only Ad- <i>Arntl</i> <sup>-/-</sup> mice at T=6 and T=18, classes assigned by time.  | PLS-DA | 50.5 | 91.8 | <b>56.9</b> |
| <b>M27</b> | Only control mice at T=6 and T=18, classes assigned by time.                          | PLS-DA | 58.1 | 97.4 | <b>68.6</b> |
| <b>M28</b> | Both genotypes, at T=12 and T=18, classes assigned by time.                           | PLS-DA | 44.8 | 82.0 | <b>66.7</b> |
| <b>M29</b> | Only Ad- <i>Arntl</i> <sup>-/-</sup> mice at T=12 and T=18, classes assigned by time. | PLS-DA | 69.8 | 99.9 | <b>90.0</b> |
| <b>M30</b> | Only control mice at T=12 and T=18, classes assigned by time.                         | PLS-DA | 53.3 | 88.2 | <b>61.6</b> |
